# Supplementary material for: Mesoporous CuO Prepared in a Natural Deep Eutectic Solvent Medium for Effective Photodegradation of Rhodamine B
Source: MDPI journal article supplement (doi:10.3390/molecules28145554), 2023-07-20
Supplement: s1 [file s1]

**Mesoporous CuO Prepared in a Natural Deep Eutectic Solvent Medium for Effective  
Photodegradation of Rhodamine B**

Sheli Zhang<sup>1</sup>, Yuerong Yan<sup>1</sup>, Wei Hu<sup>2</sup> and Yunchang Fan<sup>2,\*</sup>

<sup>1</sup>College of Science and Technology, Jiaozuo Teachers College, Jiaozuo 454000, China;

1295006035@jzsz.edu.cn (S.Z.); 1295002321@jzsz.edu.cn (Y.Y.)

<sup>2</sup>College of Chemistry and Chemical Engineering, Henan Polytechnic University, Jiaozuo

454003, China; fanyunchang@hpu.edu.cn (Y.F.); huwei@home.hpu.edu.cn (W.H.)

\*Correspondence: fanyunchang@hpu.edu.cn (Y.F.)

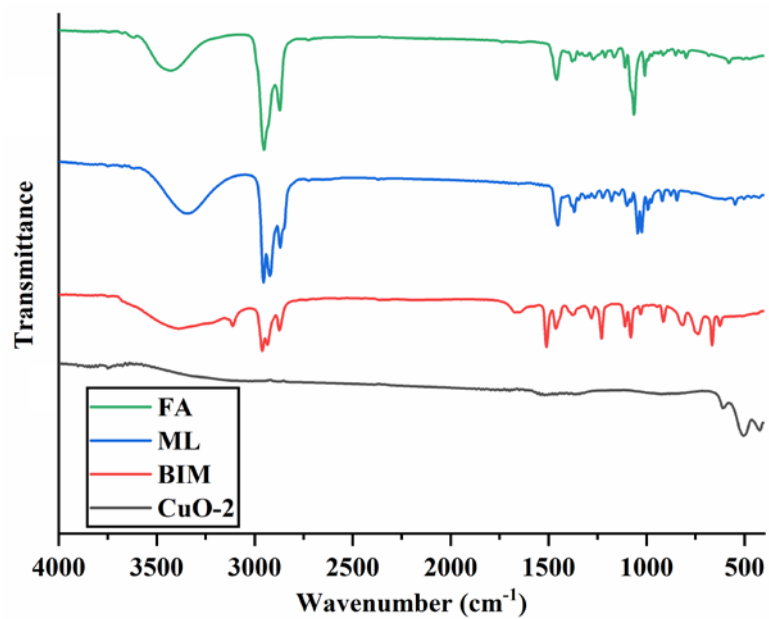

**Figure S1.** The FT-IR spectra of FA, ML, BIM and CuO-2 NPs.

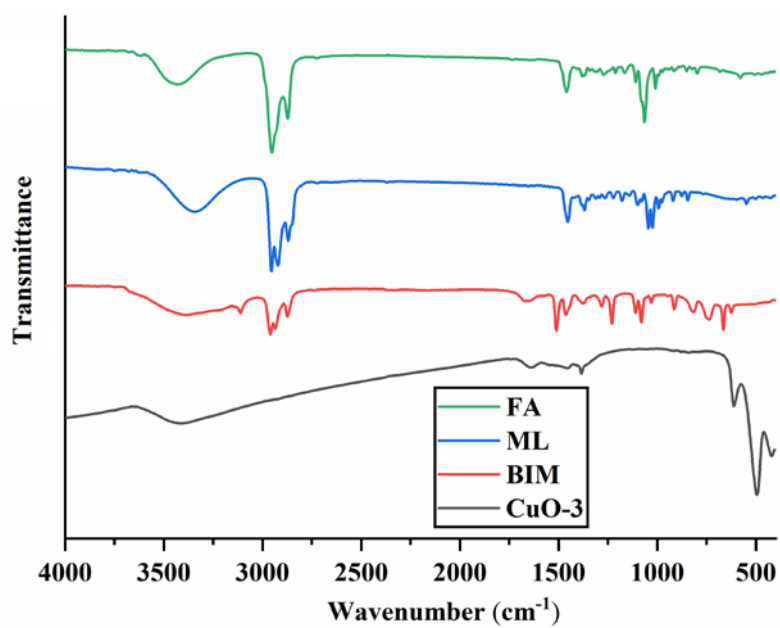

**Figure S2.** The FT-IR spectra of FA, ML, BIM and CuO-3 NPs.

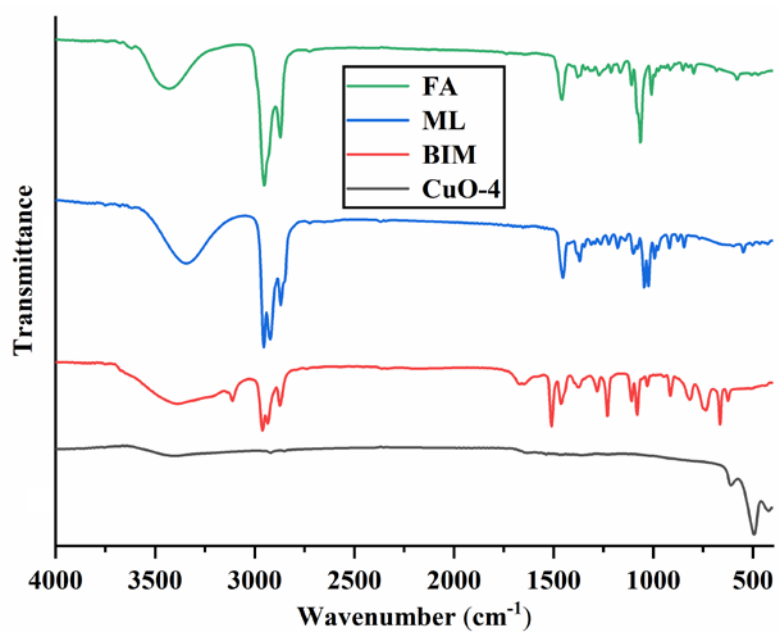

**Figure S3.** The FT-IR spectra of FA, ML, BIM and CuO-4 NPs.

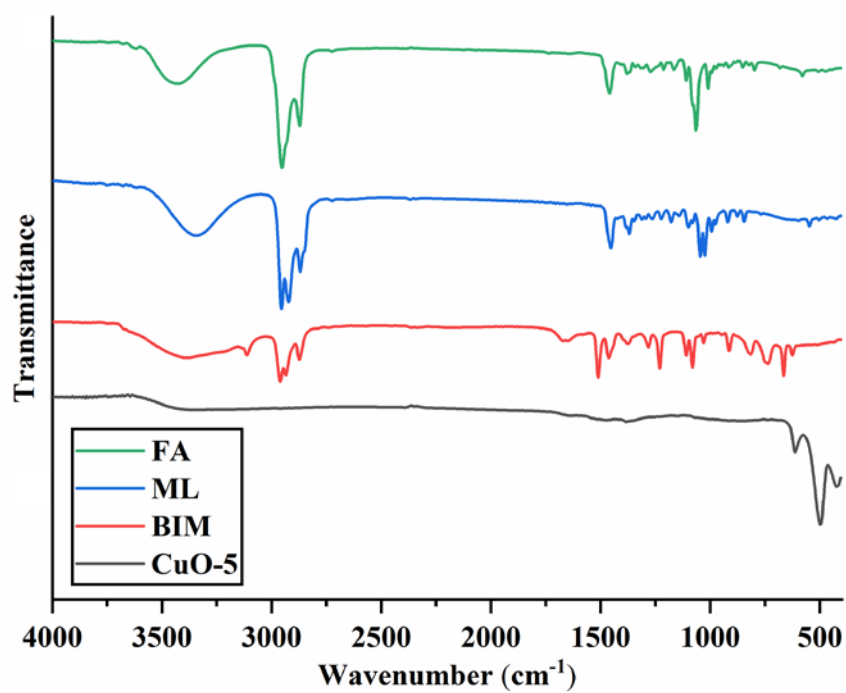

**Figure S4.** The FT-IR spectra of FA, ML, BIM and CuO-5 NPs.

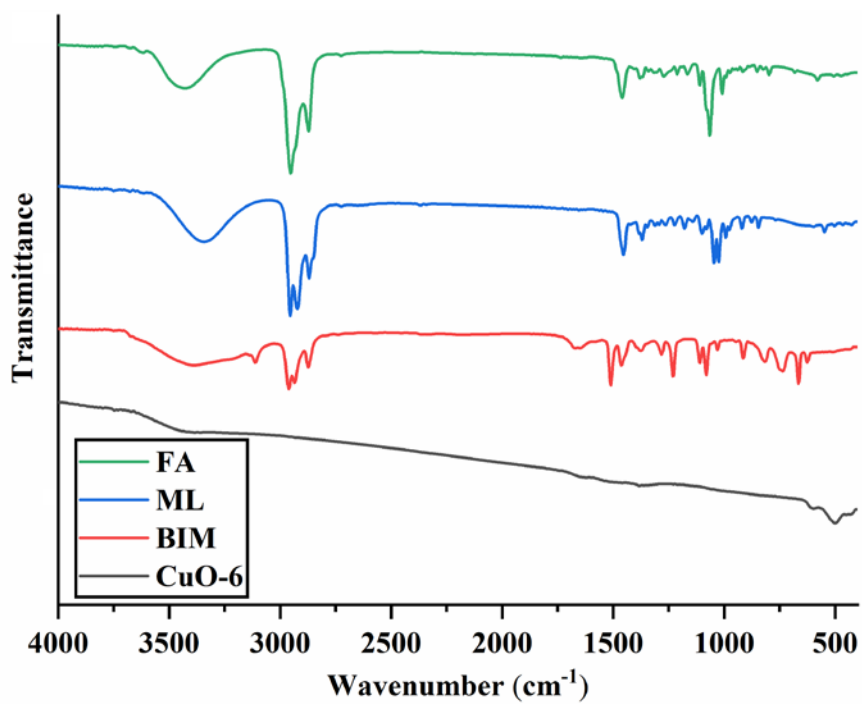

**Figure S5.** The FT-IR spectra of FA, ML, BIM and CuO-6 NPs.

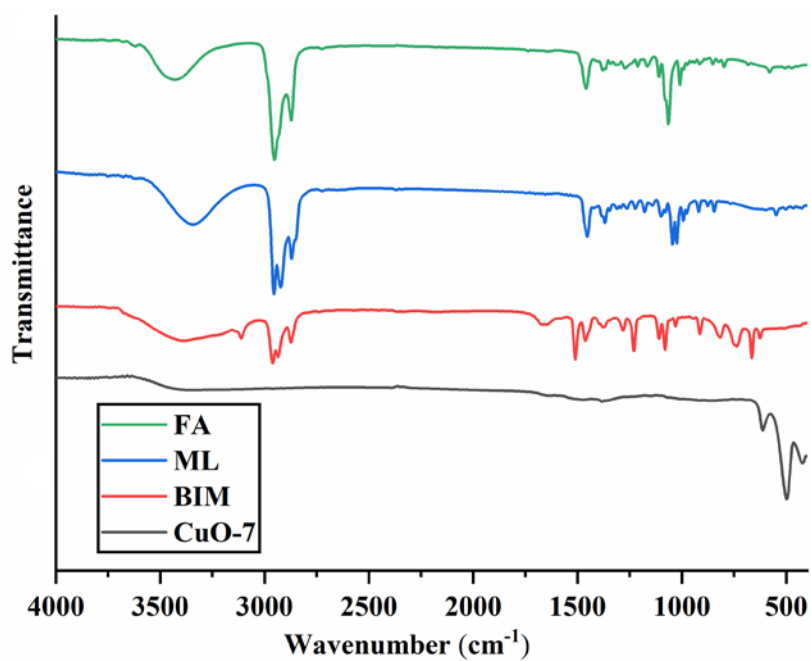

**Figure S6.** The FT-IR spectra of FA, ML, BIM and CuO-7 NPs.

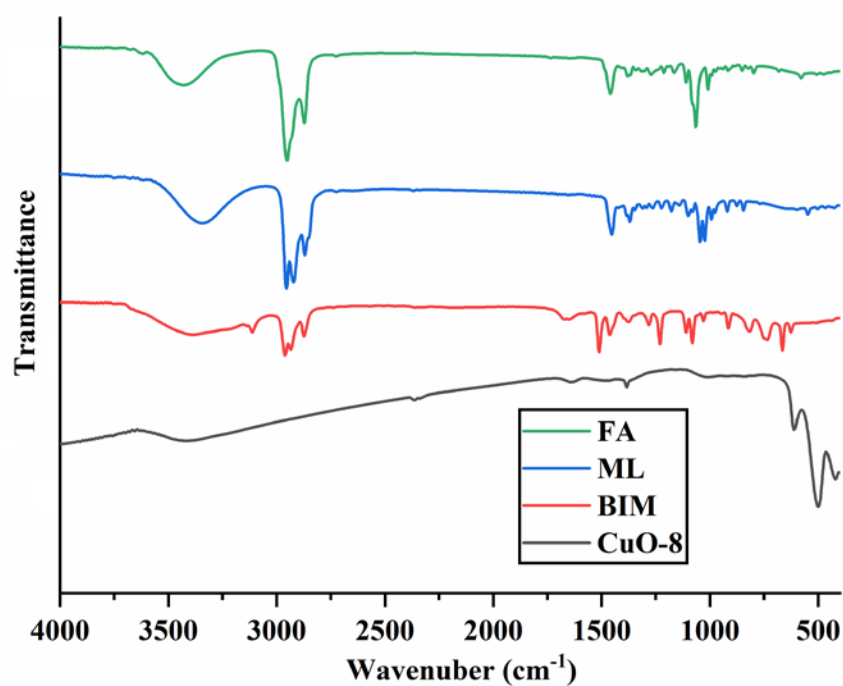

**Figure S7.** The FT-IR spectra of FA, ML, BIM and CuO-8 NPs.

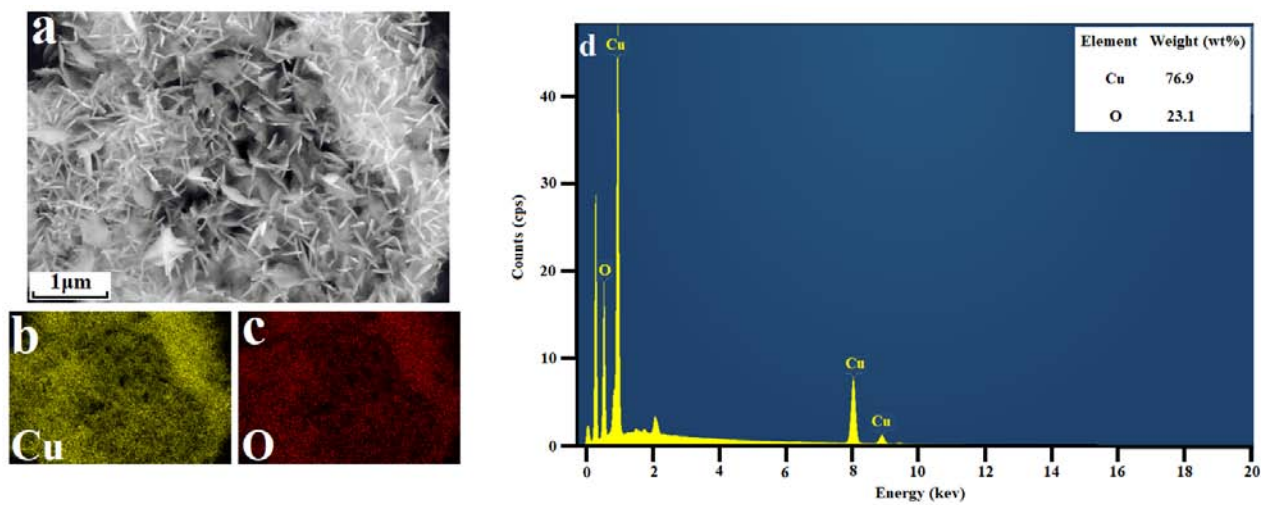

**Figure S8.** The SEM image (a), EDS mapping (b, c) and EDX pattern (d) of CuO-2 NPs.

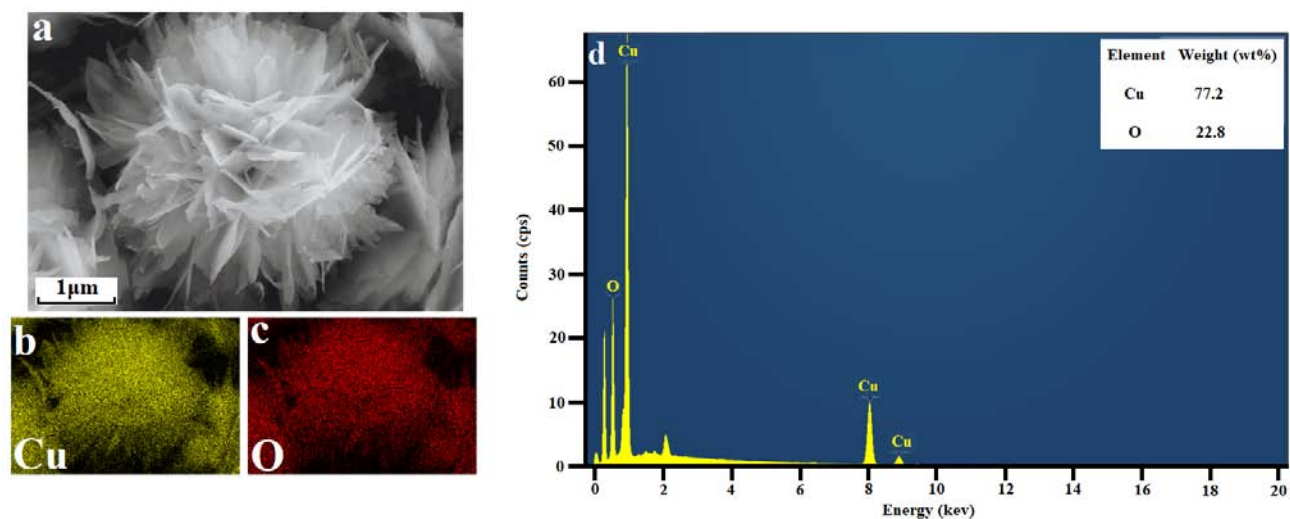

**Figure S9.** The SEM image (a), EDS mapping (b, c) and EDX pattern (d) of CuO-3 NPs.

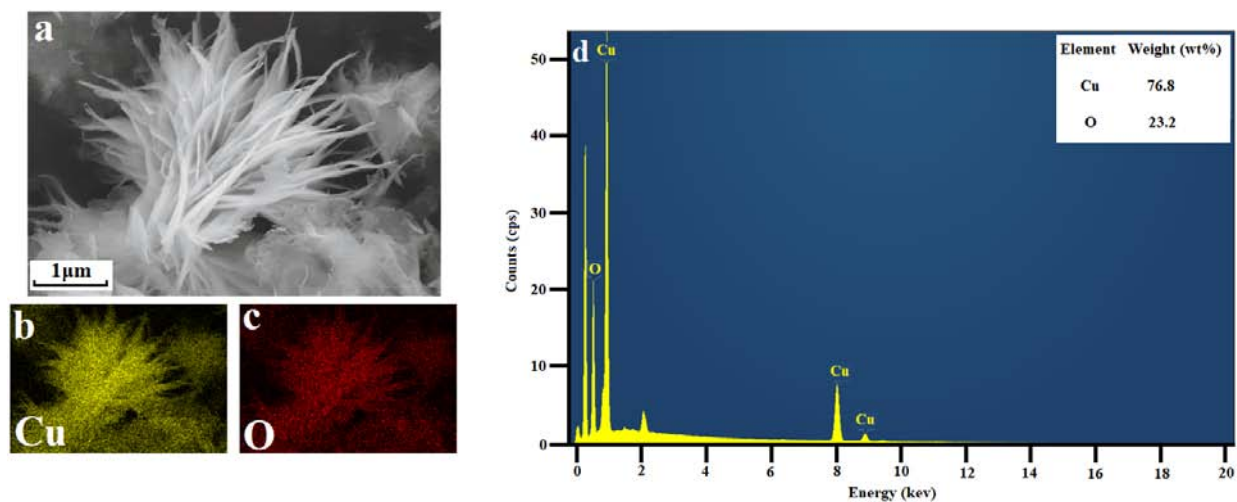

**Figure S10.** The SEM image (a), EDS mapping (b, c) and EDX pattern (d) of CuO-4 NPs.

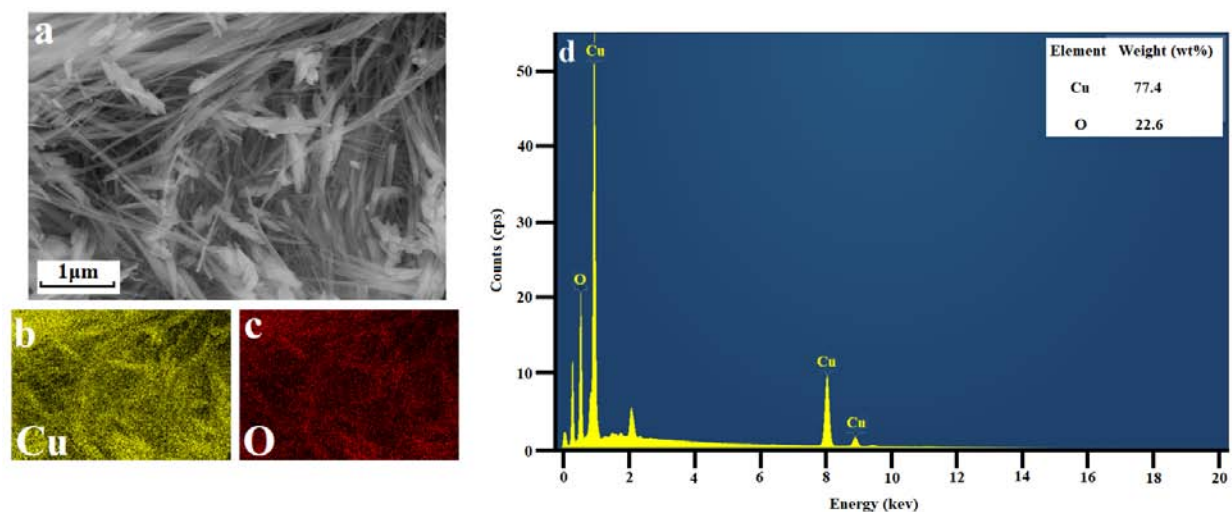

**Figure S11.** The SEM image (a), EDS mapping (b, c) and EDX pattern (d) of CuO-5 NPs.

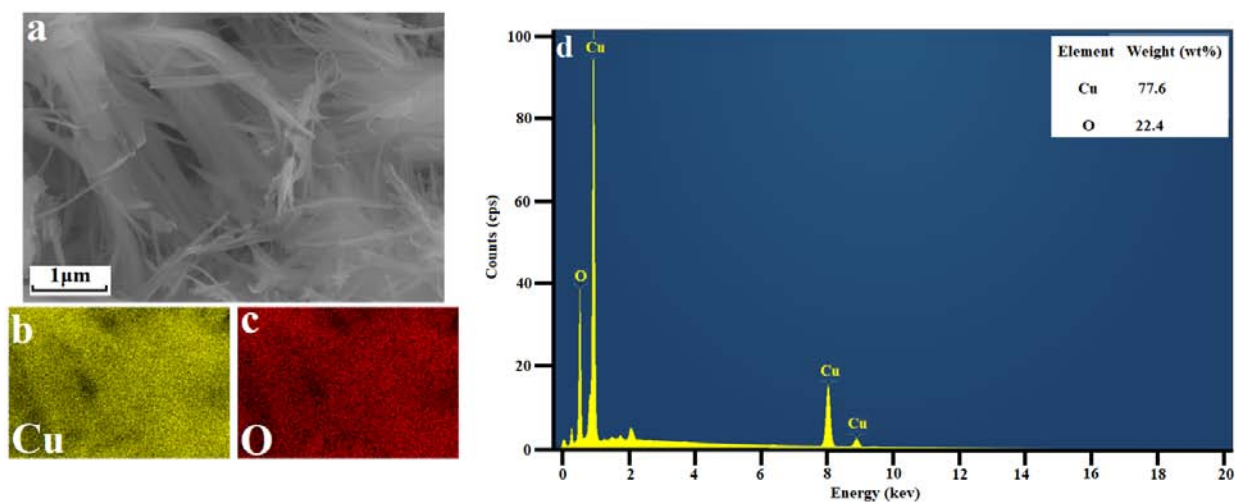

**Figure S12.** The SEM image (a), EDS mapping (b, c) and EDX pattern (d) of CuO-6 NPs.

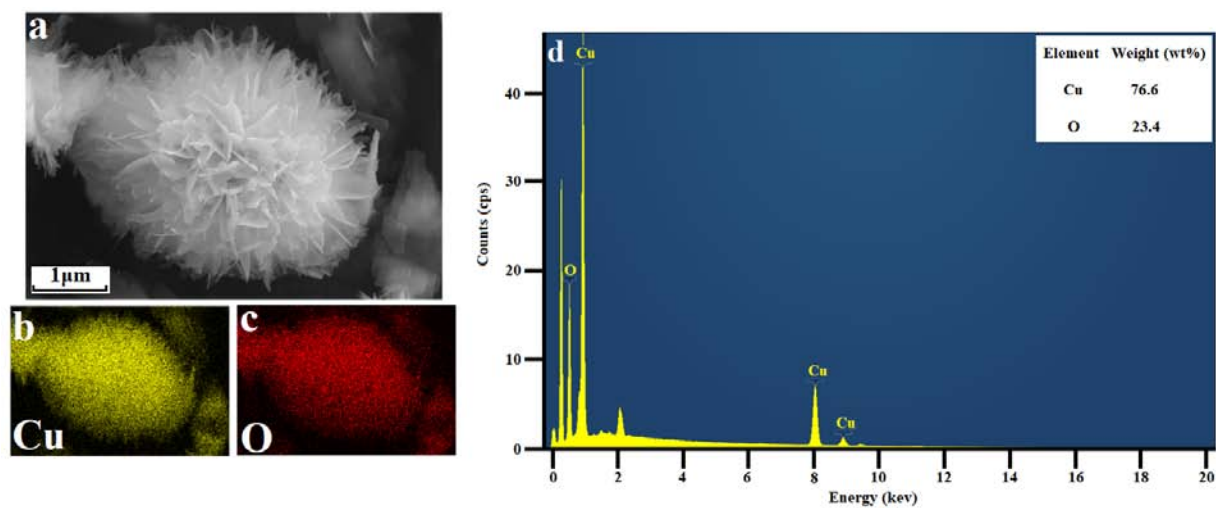

**Figure S13.** The SEM image (a), EDS mapping (b, c) and EDX pattern (d) of CuO-7 NPs.

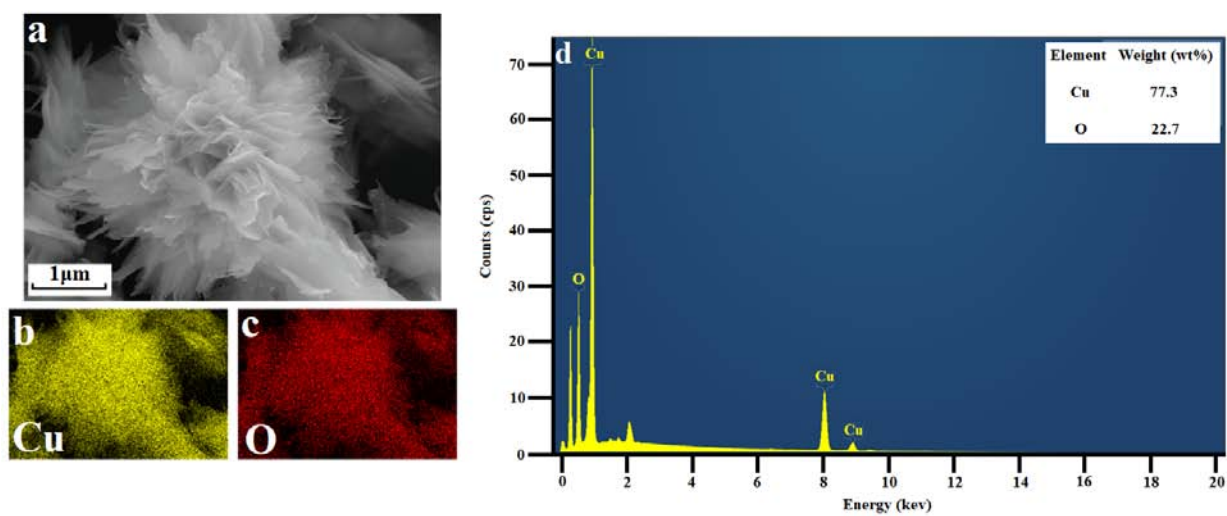

**Figure S14.** The SEM image (a), EDS mapping (b, c) and EDX pattern (d) of CuO-8 NPs.

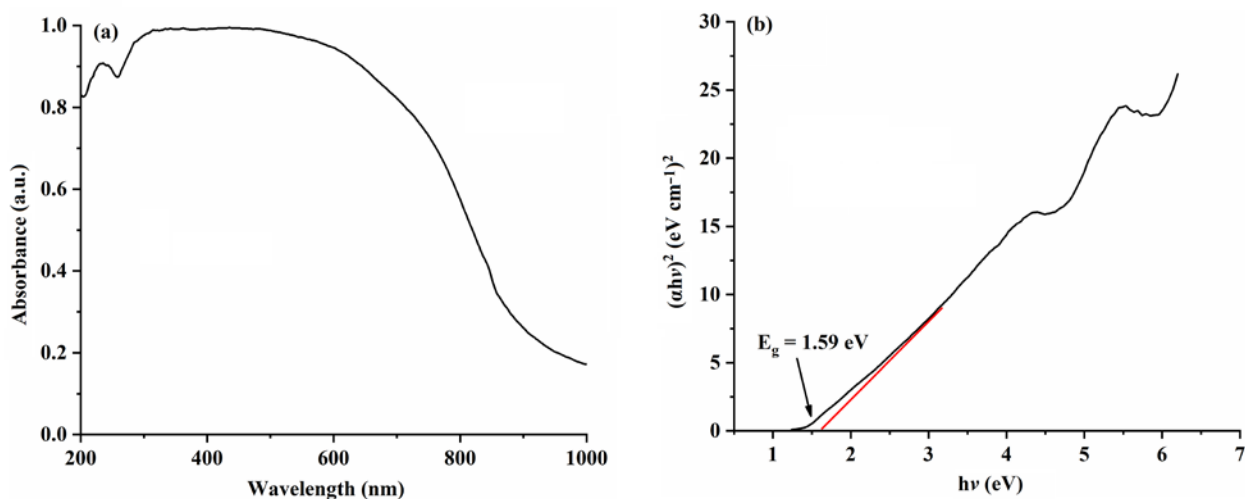

**Figure S15.** The UV-Vis absorption spectrum (a) and Tauc plot (b) of mesoporous CuO-2.

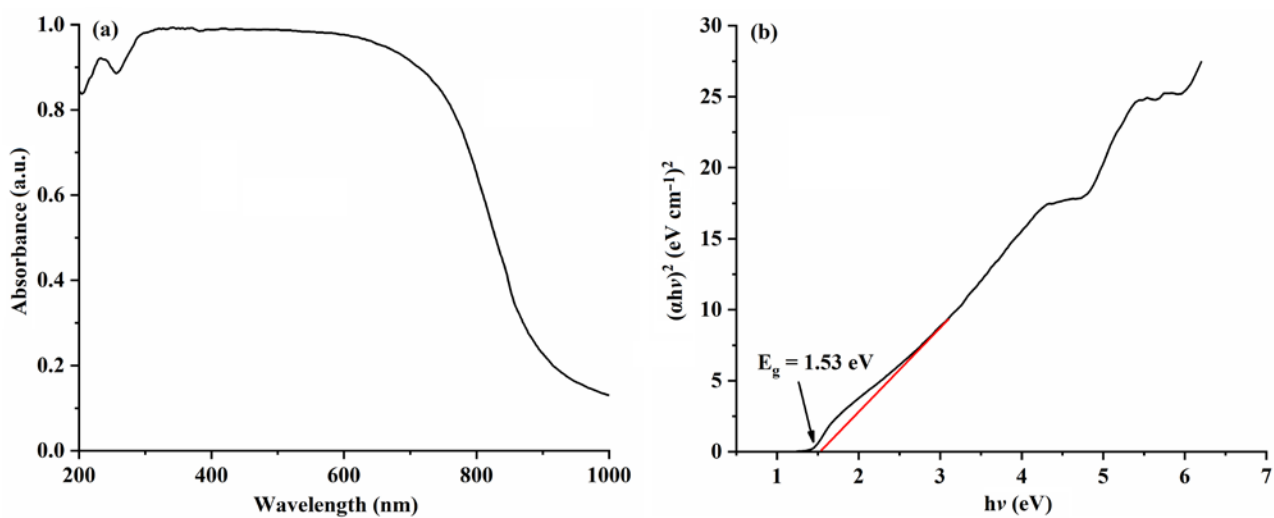

**Figure S16.** The UV-Vis absorption spectrum (a) and Tauc plot (b) of mesoporous CuO-3.

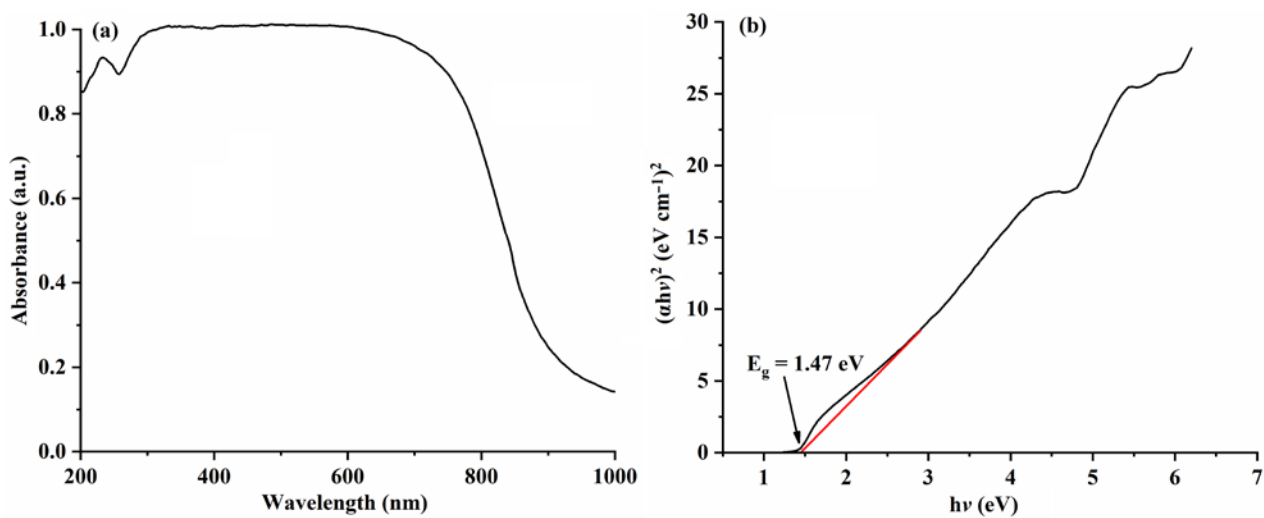

**Figure S17.** The UV-Vis absorption spectrum (a) and Tauc plot (b) of mesoporous CuO-4.



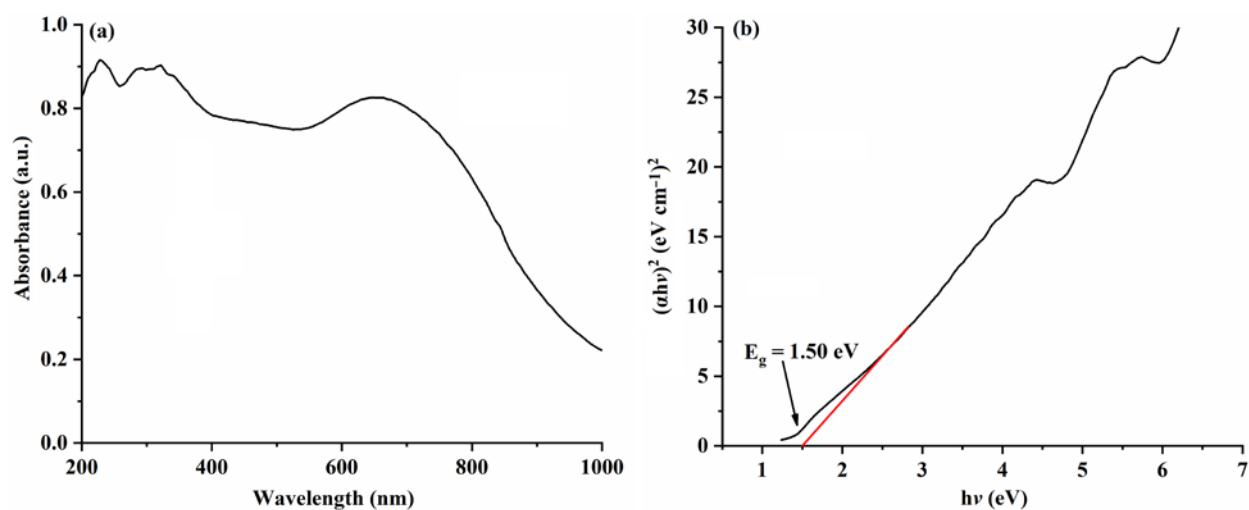

**Figure S18.** The UV-Vis absorption spectrum (a) and Tauc plot (b) of mesoporous CuO-5.

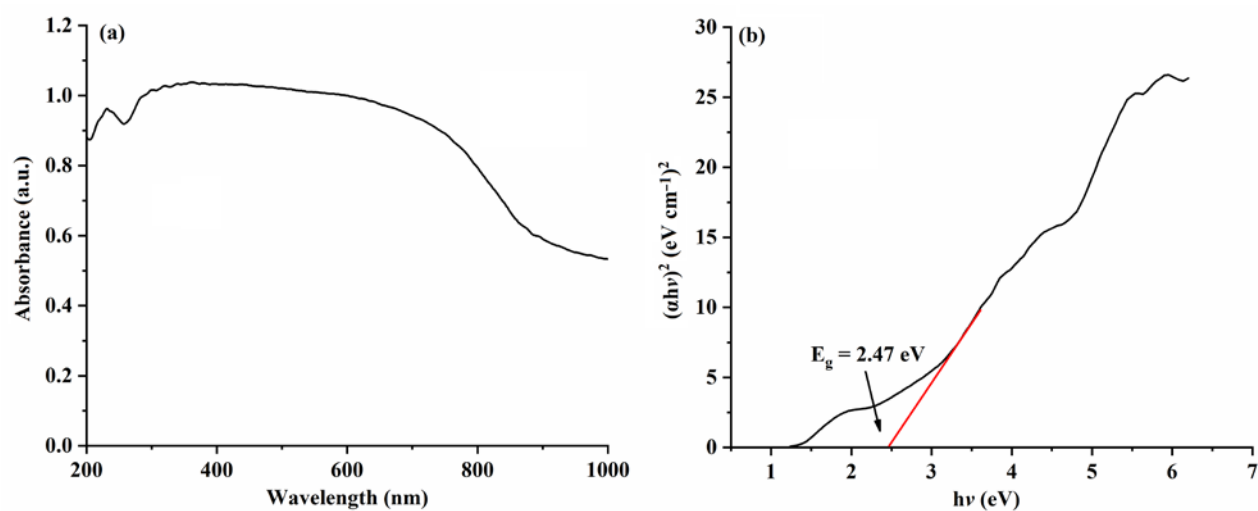

**Figure S19.** The UV-Vis absorption spectrum (a) and Tauc plot (b) of mesoporous CuO-6.

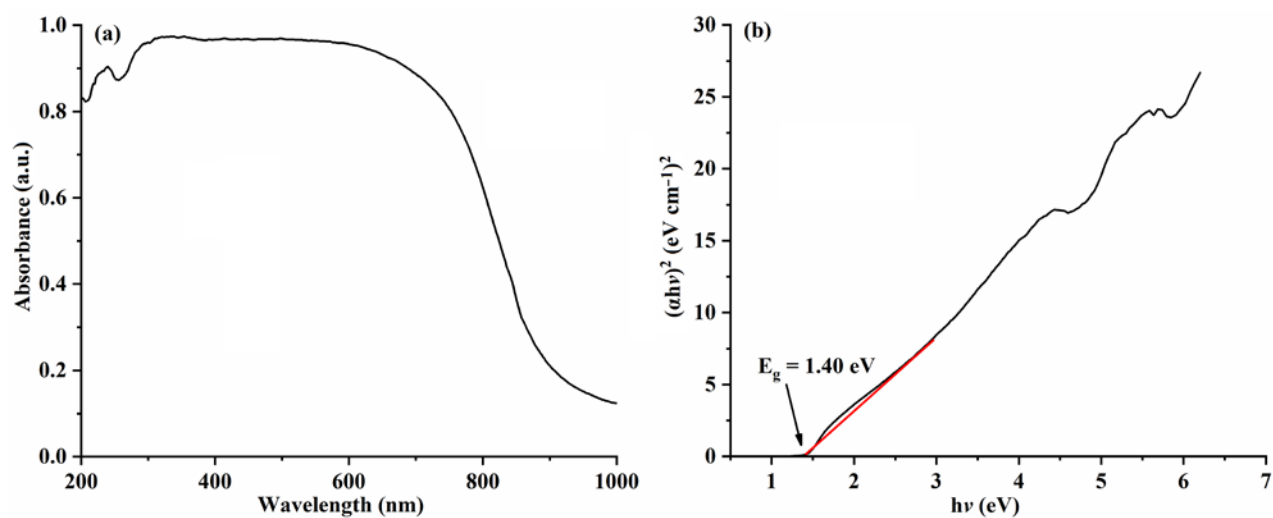

**Figure S20.** The UV-Vis absorption spectrum (a) and Tauc plot (b) of mesoporous CuO-7.

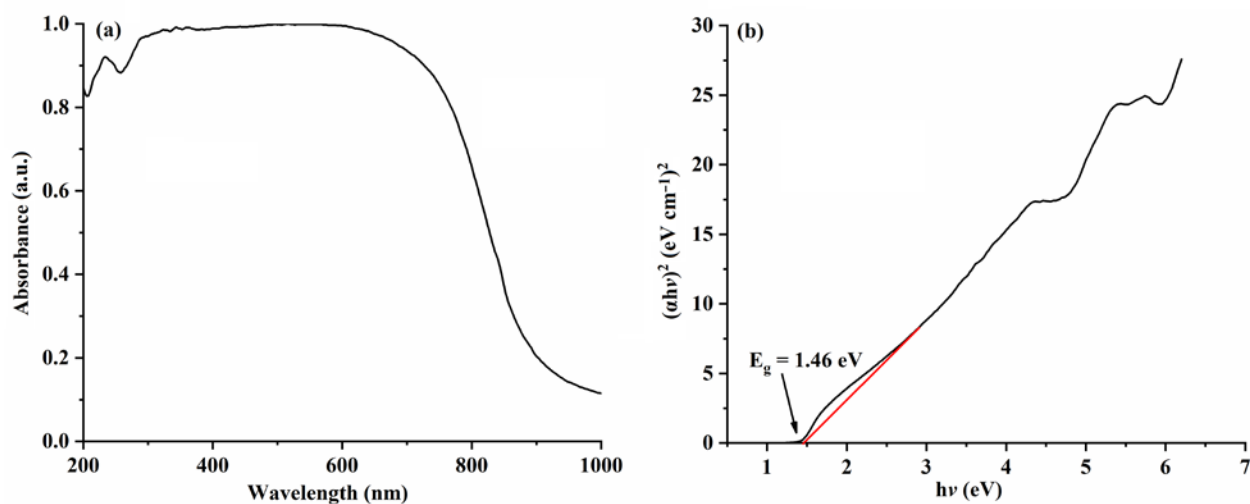

**Figure S21.** The UV-Vis absorption spectrum (a) and Tauc plot (b) of mesoporous CuO-8.

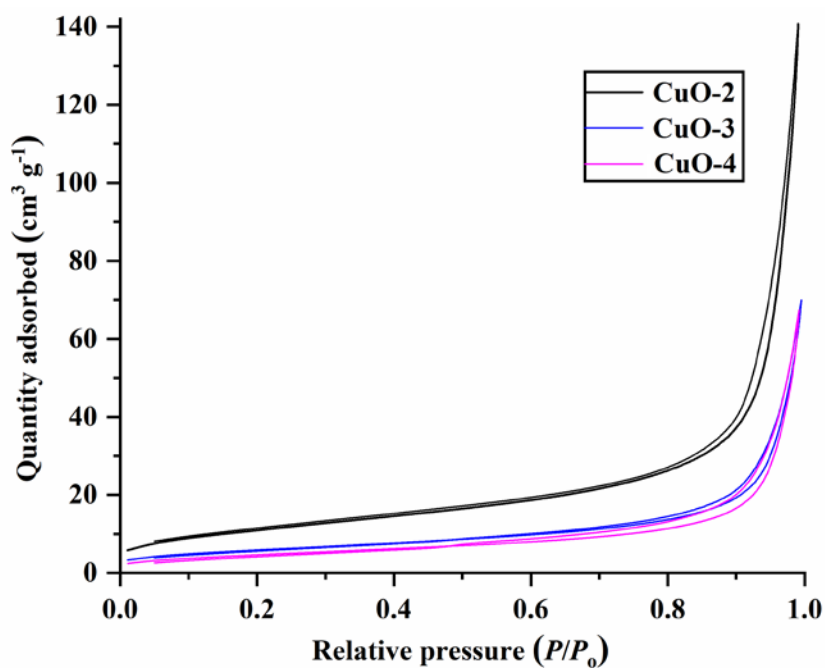

**Figure S22.** The N<sub>2</sub> adsorption-desorption isotherms (77 K) of the synthesized CuO-2, CuO-3 and CuO-4.

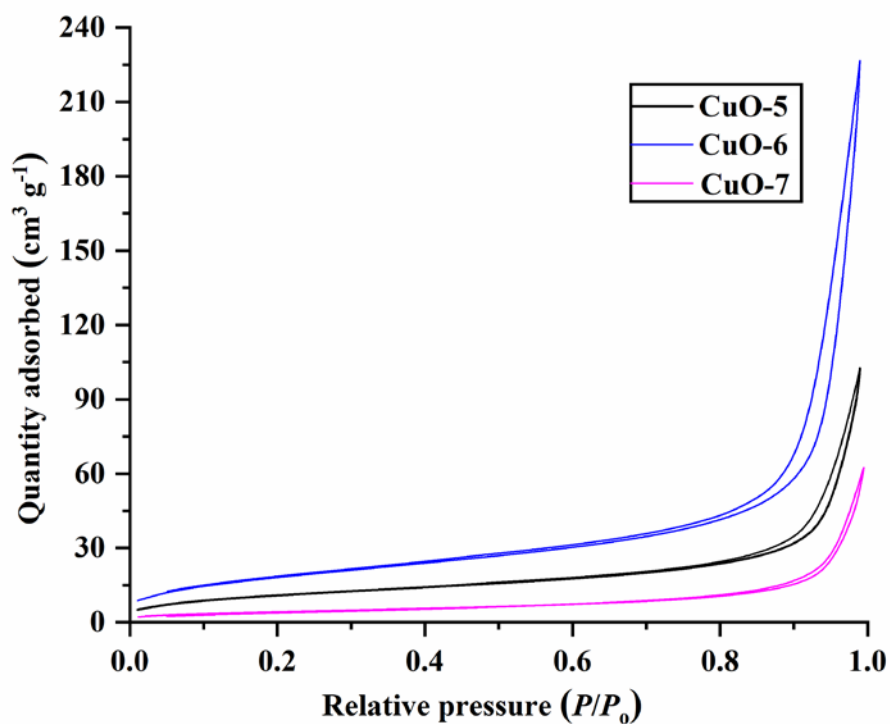

**Figure S23.** The N<sub>2</sub> adsorption–desorption isotherms (77 K) of the synthesized CuO-5, CuO-6 and CuO-7.

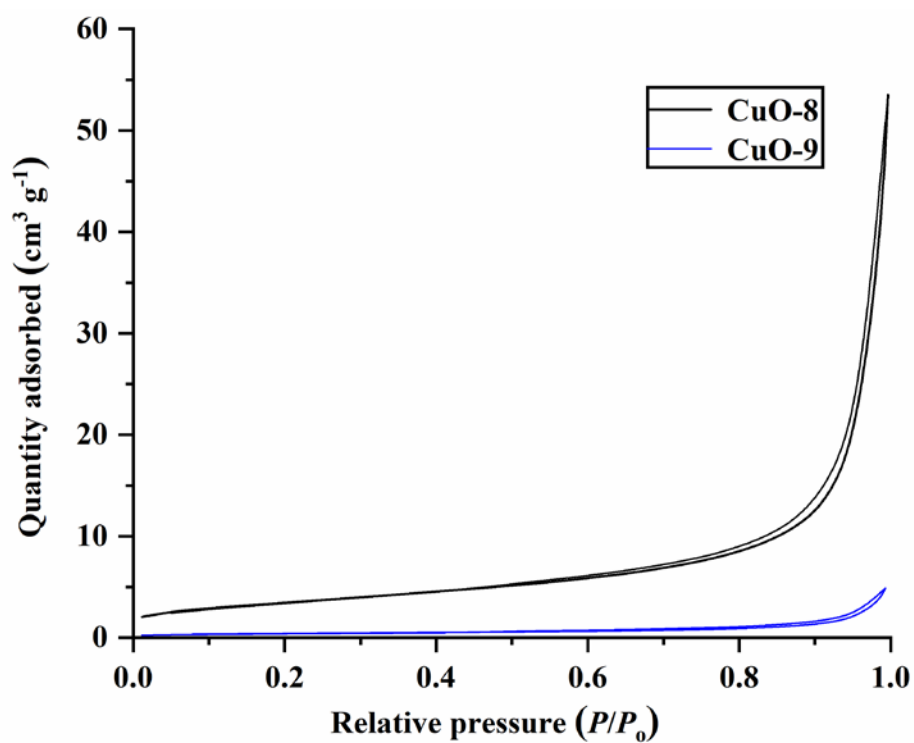

**Figure S24.** The N<sub>2</sub> adsorption–desorption isotherms (77 K) of the synthesized CuO-8 and CuO-9.
